# Supplementary material for: Germline Allelic Expression of Genes at 17q22 Locus Associates with Risk of Breast Cancer
Source: bioRxiv or medRxiv preprint supplement (doi:10.1101/2021.12.10.21267625), 2021-12-14
Supplement: Supplementary file [file media-2.pdf]

# Germline Allelic Expression of Genes at 17q22 Locus Associates with Risk of Breast Cancer

Filipa Esteves <sup>a,b</sup>, Joana M. Xavier <sup>c</sup>, Anthony M. Ford<sup>d</sup>, Cátia Rocha <sup>b</sup>, Paul Pharoah <sup>e</sup>, Carlos Caldas <sup>f,g</sup>, Suet-Feung Chin <sup>f</sup>, Ana-Teresa Maia <sup>b,c\*</sup>

**Table S1. Oligonucleotides used as labelled probes or unlabelled competitors in EMSA analysis, as well as inserts in the reporter assays. The two alleles [reference/alternative] of each SNP are indicated.**

| Gene   | Method         | SNP        | Sense strand (5' – 3')<br>Antisense strand (5' – 3')                                                                                                                                                      |
|--------|----------------|------------|-----------------------------------------------------------------------------------------------------------------------------------------------------------------------------------------------------------|
| COX11  | EMSA           | rs8066588  | CATTTGCTCAAACC[C/T]ACCTGTGATTTTCTCC<br>GGAAGAAAATCACAGGT[G/A]GGTTTTGAGCAAATG                                                                                                                              |
|        | Reporter Assay | rs17817901 | TCAAGGATCCAATCAGTGTATCCTGGAAGTGTTA[C/T]GCGTCTGTTA[C/T]GCGTCTGTTA[C/T]<br>JCTATTTAATCTTCATTATAGCAGA<br>CTAGTCTGCTATAATGAAGATTAATAGA[G/A]TAACAGACGC[G/A]TAACAGACGC[G/A]TAAC<br>AGTTCCAGGATAACACTGATTGGATCCT |
| STXBP4 | EMSA           | rs9896044  | GCATACTACTGTTTATTT[C/G]CTATTACAAGAACAACCTTCT<br>AGAAAGTGTCTTGTAAATAG[G/C]AAATAACAAGTAAGTATGC                                                                                                              |
|        |                | rs9891865  | ATTACTGGAATCCTGTGG[C/T]TGAGGCCTTGCAAGTTTGT<br>ACAACTTGCAAGGCCCTCA[G/A]CCAACAGGGATTCCAGTAAT                                                                                                                |

**Table S2. Summary statistics for differential allelic expression analysis in the 17q22 risk locus.**

| SNP        | Position (hg38) | Gene         | Ref Allele | Alt Allele | MAF  | LD with rs2787486 (r2) | P-value  | p.adjust | mean   | CIinf  | CI sup |
|------------|-----------------|--------------|------------|------------|------|------------------------|----------|----------|--------|--------|--------|
| rs9899602  | 54909547        | TOM1L1       | T          | C          | 0.29 | 0.527061               | 1.88e-07 | 6.83e-07 | 0.410  | 0.298  | 0.522  |
| rs9303360  | 54924095        | TOM1L1       | T          | C          | 0.42 | 0.192934               | 0.027    | 0.036    | -0.334 | -0.629 | -0.040 |
| rs12165058 | 54944688        | TOM1L1       | T          | C          | 0.46 | 0.166612               | 0.768    | 0.796    | 0.015  | -0.089 | 0.119  |
| rs12944690 | 54952253        | TOM1L1/COX11 | A          | G          | 0.46 | 0.163259               | 4.21e-05 | 1.22e-04 | -0.199 | -0.284 | -0.115 |
| rs12936860 | 54952865        | TOM1L1/COX11 | G          | A          | 0.27 | 0.570168               | 6.97e-05 | 1.84e-04 | -0.209 | -0.295 | -0.122 |
| rs17817865 | 54955064        | TOM1L1/COX11 | G          | A          | 0.27 | 0.094121               | 1.22e-13 | 1.18e-12 | 0.350  | 0.296  | 0.404  |
| rs2287136  | 54960721        | TOM1L1/COX11 | G          | A          | 0.27 | 0.093248               | 6.35e-03 | 9.21e-03 | 0.098  | 0.030  | 0.166  |
| rs17817901 | 54961384        | TOM1L1/COX11 | A          | G          | 0.27 | 0.570168               | 1.66e-22 | 2.41e-21 | -1.050 | -1.107 | -0.995 |
| rs7643     | 54962122        | TOM1L1/COX11 | A          | G          | 0.46 | 0.16787                | 1.71e-26 | 4.95e-25 | -1.110 | -1.166 | -1.054 |

|            |          |                      |   |   |       |          |          |          |        |        |        |
|------------|----------|----------------------|---|---|-------|----------|----------|----------|--------|--------|--------|
| rs2541240  | 54965511 | COX11                | G | A | 0.33  | 0.14134  | 4.21e-03 | 6.42e-03 | -0.359 | -0.594 | -0.124 |
| rs17817950 | 54967964 | COX11/STXBP4         | G | A | 0.27  | 0.116478 | 0.033    | 0.042    | 0.277  | 0.024  | 0.531  |
| rs12947685 | 54968158 | COX11/STXBP4         | T | C | 0.27  | 0.116478 | 0.141    | 0.158    | 0.131  | -0.047 | 0.309  |
| rs8064882  | 54968848 | COX11/STXBP4         | C | T | 0.27  | 0.11699  | 0.037    | 0.045    | 0.304  | 0.019  | 0.589  |
| rs4794549  | 54969365 | COX11/STXBP4         | C | A | 0.29  | 0.130241 | 1.79e-03 | 3.16e-03 | 0.282  | 0.116  | 0.449  |
| rs1420526  | 55052047 | STXBP4               | T | C | 0.26  | 0        | 1.69e-03 | 3.16e-03 | 0.227  | 0.095  | 0.358  |
| rs17818238 | 55068243 | STXBP4               | G | A | 0.21  | 0.131223 | 0.136    | 0.157    | -0.120 | -0.280 | 0.041  |
| rs8069999  | 55081131 | STXBP4               | G | A | 0.19  | 0.130523 | 1.57e-03 | 3.16e-03 | -0.159 | -0.249 | -0.069 |
| rs2628318  | 55132951 | STXBP4               | G | A | 0.42  | 0.288655 | 8.91e-07 | 2.87e-06 | 0.387  | 0.259  | 0.514  |
| rs2628315  | 55149261 | STXBP4               | G | A | 0.28  | 0.985466 | 5.18e-08 | 2.15e-07 | 0.617  | 0.464  | 0.770  |
| rs244303   | 55161367 | STXBP4               | A | G | 0.41  | 0.267585 | 0.467    | 0.502    | 0.028  | -0.050 | 0.105  |
| rs244301   | 55161779 | STXBP4               | T | C | 0.41  | 0.265277 | 1.96e-03 | 3.16e-03 | -0.115 | -0.183 | -0.046 |
| rs244298   | 55164026 | STXBP4               | T | C | 0.41  | 0.267585 | 7.41e-09 | 3.58e-08 | -0.486 | -0.607 | -0.365 |
| rs171512   | 55196232 | downstream<br>STXBP4 | G | T | 0.35  | 0        | 1.02e-03 | 2.27e-03 | 0.306  | 0.135  | 0.478  |
| rs2287223  | 55315491 | HLF                  | G | A | 0.37  | 0        | 3.27e-04 | 7.91e-04 | 0.172  | 0.088  | 0.256  |
| rs17746075 | 55321098 | HLF                  | T | G | 0.15  | 0        | 1.92e-03 | 3.16e-03 | 0.183  | 0.081  | 0.285  |
| rs11547827 | 55393101 | MMD                  | C | T | 0.27  | 0        | 2.25e-12 | 1.63e-11 | -0.417 | -0.481 | -0.353 |
| rs4476230  | 55393744 | MMD                  | T | G | 0.39  | 0        | 1.17e-09 | 6.77e-09 | -0.273 | -0.335 | -0.210 |
| rs4450463  | 55404443 | MMD                  | C | T | 0.034 | 0        | 0.012    | 0.0174   | 0.333  | 0.120  | 0.546  |
| rs4794600  | 55546472 | upstream SMIM36      | G | A | 0.32  | 0        | 0.859    | 0.859    | 0.024  | -0.256 | 0.305  |

**Legend:**

MAF – minor allele frequency in the 1000GENOMES:phase\_3:EUR population; P-value – p-value of a two-sided t-test for mean equal to zero; p.adjust – p-value adjusted for multiple testing with fdr correction; Clinf and CIsup – Inferior and superior limits of the 95% confidence interval (CI) of the mean.

**Table S3. Functional annotations of 106 candidate regulatory variants in the 17q22 risk locus, retrieved from Haploreg v4.1 and RegulomeDB.**

Please see Esteves\_TableS3.csv at:

[https://ualg365-my.sharepoint.com/:x:/g/personal/atmaia\\_ualg\\_pt/EX-IHyw8EM9PkYhC6NsQ9o4BBmISk8B-W7AUFy98zIuUdA?e=er0Dd8](https://ualg365-my.sharepoint.com/:x:/g/personal/atmaia_ualg_pt/EX-IHyw8EM9PkYhC6NsQ9o4BBmISk8B-W7AUFy98zIuUdA?e=er0Dd8)

**Legend:**

Chr – chromosome; pos\_hg38 – genomic position according to hg38; rsID - variant ID in dbSNP build 141; ref – reference allele; alt - alternative allele; AFR, AMR, ASN, EUR –

minor allele frequency in continental populations (AFR, AMR, ASN, EUR); Chromatin\_States Imputed - chromatin state segmentations (15-state and 25-state) from the Roadmap Epigenomics Project; Chromatin\_Marks - chromatin mark ChIP-seq tracks (gappedPeak calls) from the Roadmap Epigenomics Project; DNase - DNase tracks (narrowPeak calls) from the Roadmap Epigenomics Project; ChIP-Seq - SPP narrow peaks called by the ENCODE project; eQTL – eQTLs identified mainly in the GTEx analysis V6 and the GEUVADIS analysis; GWAS – GWAS NHGRI Catalog data; GRASP – data from GRASP Build 2.0.0.0; PWM Motifs – significant position weight matrices (PWMs) for known protein motifs; GENCODE\_id and GENCODE\_name – Gene ID and name in GENCODE version 13; RefSeq\_id and RefSeq\_name – Gene ID and name in the RefSeq NCBI Reference Sequence Database.

**Table S4. Regulatory motifs altered by candidate rSNPs, data from Haploreg v4.1.**

Position weight matrices (PWMs) were calculated as described in the documentation of Haploreg v4.1 ([../haploreg/documentation\\_v4.1.html](http://haploreg.org/documentation_v4.1.html)). The change in log-odds (LOD) score for reference and alternative alleles is presented for motifs which passed significant PWM calculation for both alleles and overlapped the variant nucleotide.

| Candidate SNP | Position Weight Matrix ID | Strand | Ref LOD Score | Alt LOD Score | Allelic Difference |
|---------------|---------------------------|--------|---------------|---------------|--------------------|
| rs9891865     | E2A_5                     | -      | 11.7          | 3.8           | 7.9                |
|               | Spz1_1                    | -      | 11.9          | 0.1           | 11.8               |
|               | ZEB1_disc1                | -      | 12.7          | 10.7          | 2                  |
| rs8066588     | NF-1_2                    | +      | 11.9          | 5.8           | 6.1                |
|               | SMC3_disc2                | -      | -6.7          | 5.2           | -11.9              |
|               | TCF12_disc2               | -      | 12.1          | 0.1           | 12                 |
|               | THAP1_disc1               | +      | 3.4           | 4.6           | -1.2               |
| rs9896044     | ELF1_known1               | -      | 15.3          | 3.4           | 11.9               |
|               | Fox                       | +      | 2.1           | 13            | -10.9              |
|               | Foxa_known1               | +      | 0.9           | 12.2          | -11.3              |
|               | Mef2_disc2                | -      | 14.9          | 2.9           | 12                 |
|               | Pou3f2_1                  | -      | 12.4          | 1.7           | 10.7               |
|               | TEF                       | +      | -0.5          | 11.1          | -11.6              |
